# Supplementary material for: A novel lncRNA uc.134 represses hepatocellular carcinoma progression by inhibiting CUL4A-mediated ubiquitination of LATS1
Source: Springer Nature journal article supplement (doi:10.1186/s13045-017-0449-4), 2017-04-18

Figure S1. Expression levels of 6 lncRNAs by qRT-PCR in HCC cells.

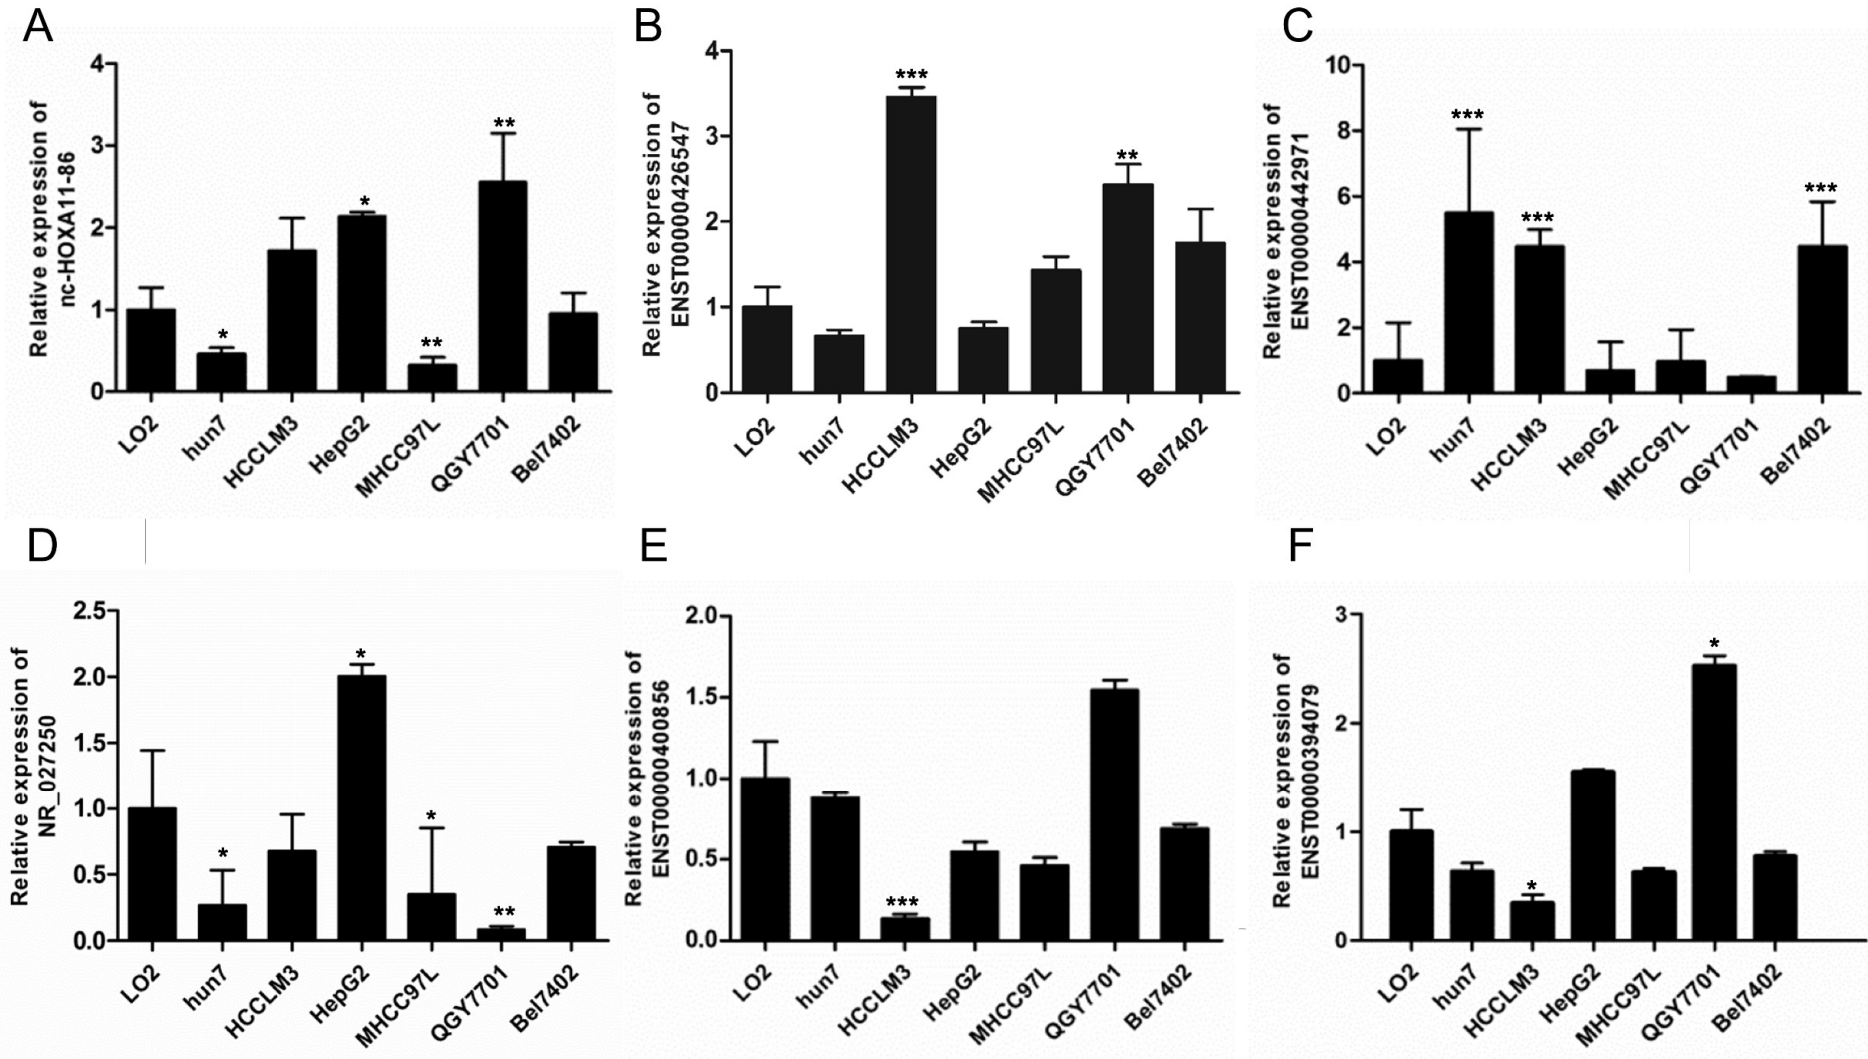

Figure S2. Full-length of human lncRNA uc.134 gene cloning.

A

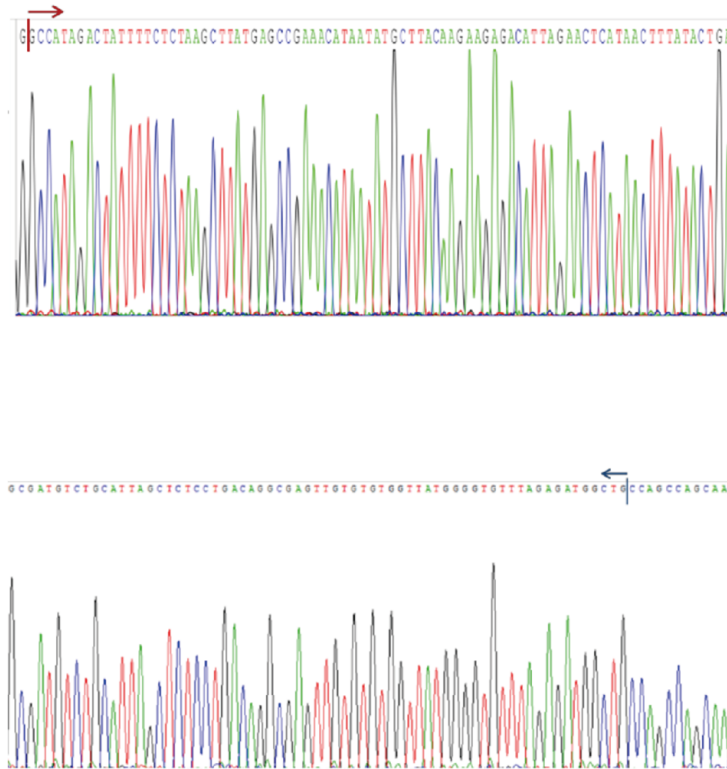

B

→  
 5'GCCATAGACTATTTTCTAAGCTTATGAGCCGAAACATAATATGCTTACAAGAAGAGAC  
 ATTAGAACTCATAACTTTATACTGACTAATGTTCAAATACAATTATGTTAGGTATCCATT  
 TGCTTCTGACATCACAAAAGAAGACAGATCACAAAAGACTTGACTTAAGCTGTCTGCTTTT  
 CCTTGCATAATAAGTCCCCTGGTTCAGGGAATCCAGTCATTATAGAATTTAGCCTAACTG  
 CTTCTAATCCATGTAGGACTTTTTATTAAAGATGAAAAC TAGTAAAGAATTAACCATGAG  
 AGGAAATAAAAGATTAATTC AAGTCAGTCATCACCGTATCTATATCTTAAGAAGTTAATA  
 GTTCAAATCTTTTTTTTTTTTTTTTTTTTTTACTGGTAGAAGACTTCTGAATATACTC  
 GCCGCTTCTGAATATACTCCAGCCCCATGGTGTAGGGGTAGGTTGCAACTATGTAAC  
 CCAAGCTGACTGGGCTGGCACCAACATCATCAGCACTGTAACATCTTCCAGCAAGTTTT  
 AGTTCATTAATCTTAATGCCATACATGTACCCCTTCTCTAGCTAGTGGGTGGCCAGACAT  
 AAAAACTGCAAACAGAGGCAAAGACATTAATGGGATGATGCAAGAAGAGAGTTGGAGAT  
 TTTTTTTAAATCTCCTTTCACATAGGAGTGACCCTAATCAATGCTTTTTGGTGAATAT  
 AAGCAGAATACATCTTGTGCTCTCTAGAATAGAGAATAAGTAGATATGTTGCCTCT  
 GGGTTC AATATTTATTTCTGAAACTCTTTTCATTTTACTACCCTCTAATAAACCAA  
 TACATCCACTTTGAAAAATAAGACTCTGGAGTTATTATATGTGCTTATAAAAAACACAC  
 CTTTAGATAAGTGGTTTTTCCAATCTCTGATACTCCTCATTCTCTCATTGATTTTC  
 AAGTTTCAACACAATTTTTTAAAAATAAGGATTTAAACATGAGACAGTAAACCTGGGTAA  
 AGAACTAAGGGTTTTGAAATTC AAAGTATTATTCTGTTTTTAGTAGCTTCCACCC  
 TTGCAAATATGTATAATAATTAGCCACAATTAATATTCTCTTTTCCCTAATTCATTATA  
 AAAAGTATAACTTCTATAACAATAATGCATTACATTTTATCATGAGAAATCATAACAATA  
 TCTTTATATTTGAACCTGAACCTCAATATGAATTTGTGAGATTTTTATATTAATGTGTG  
 TATTTTGTAATGATGTGGTATGTATATATATGTTTATTTTAGACACATTTGACTACA  
 TTTATATATTCATAGAGATTACATAGAGGCATTAACAAAAACAGGCATAGTCAGTCATGG  
 ATGTTCAATATATAAAGGTTATTGGGGATGCAAAGATATAAAGATAGAAGAACCTAG  
 TAATTGCCTTTAAGATCAGAGCACAAGCATTAGTTTGGATTTTACAAGGCCAGCCAGCA  
 ACAAAGAGCAGTAATTTATGAGCTCAGCGTAAAGAATAGCATAATGCATTAATAAATT  
 AATGCTAATGAACACTAAAATGGGGAAGGTGGTTATGATGAAAGTTTGATTTCATCTTTC  
 CTGGTTGAATGATGGCTAGTGGCTTGATTAATGGCTTAATTTCTATCAATTAGCGGGGA  
 AAAATCTCTGCGAGACAAGGGTAAATTGAGCATTGAATTACATATCTTGCTTTTGTGTG  
 CTAAGAAAAAGAGCTGCGTATCTCTGATATTAGCCACAGTGACAAATGTGGTGTGCCCT  
 GCGATGCTGCATTAGCTCTCTGACAGGCGAGTTGTGTGGTTATGGGTGTTTAGAG  
 ATGGCTG←3'

Figure S3. FISH detects endogenous lncRNA uc.134 molecules in HCC cells.

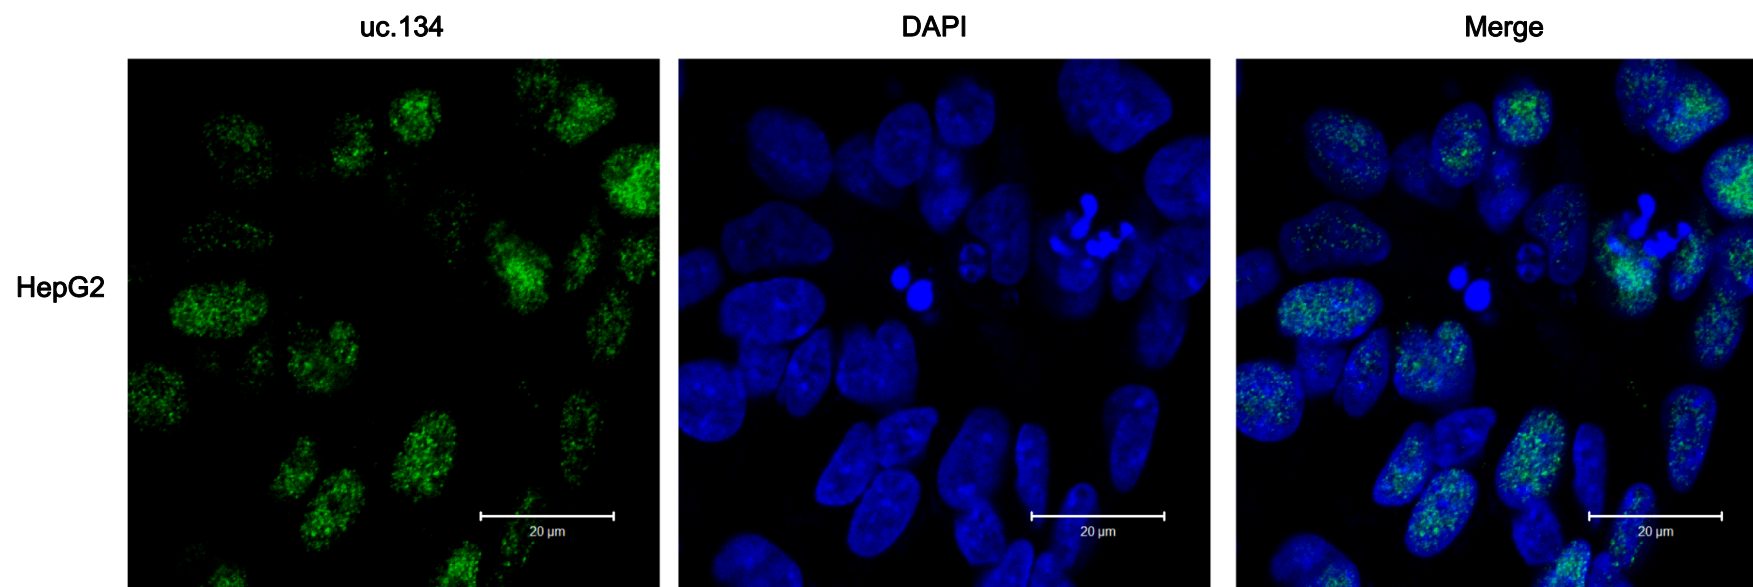

Figure S4. Transfection efficiency in HCC cells was assessed by qRT-PCR.

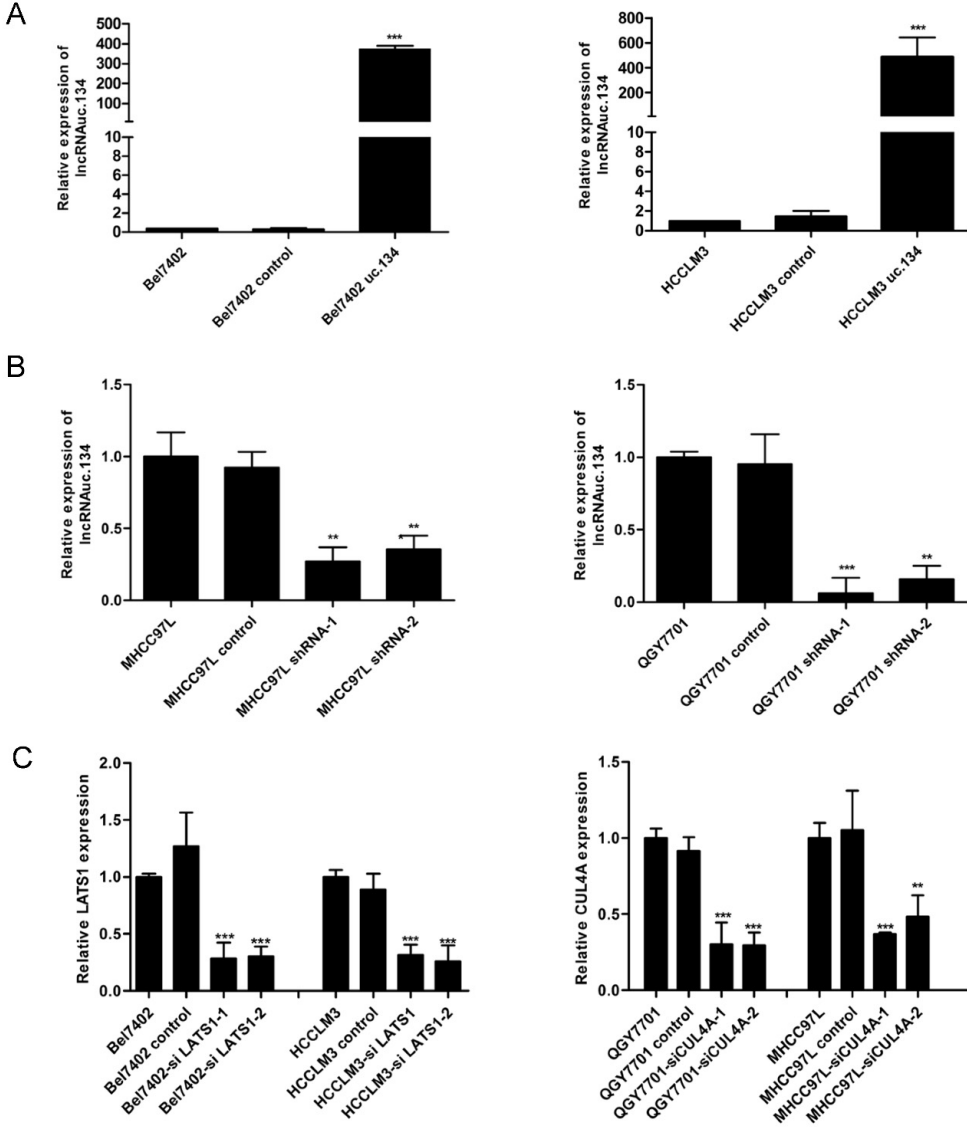

Figure S5. Knockdown of uc.134 promotes the progression and invasion of HCC in vitro and in vivo.

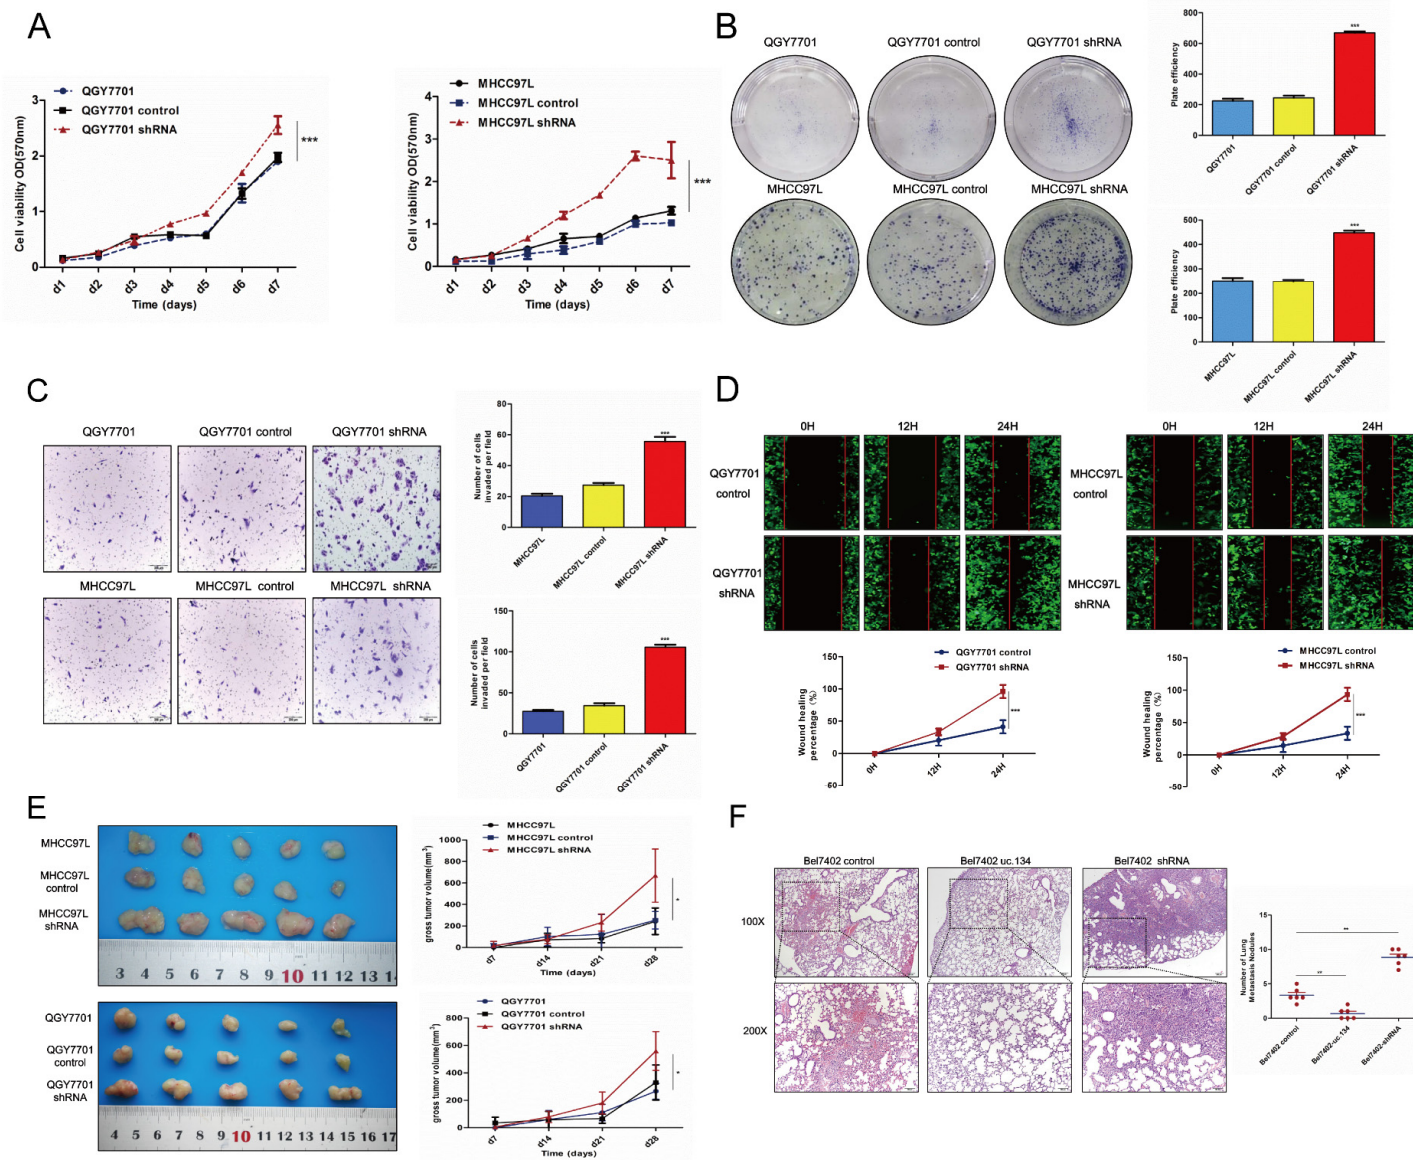

Figure S6. The histologic examination of tumors.

A

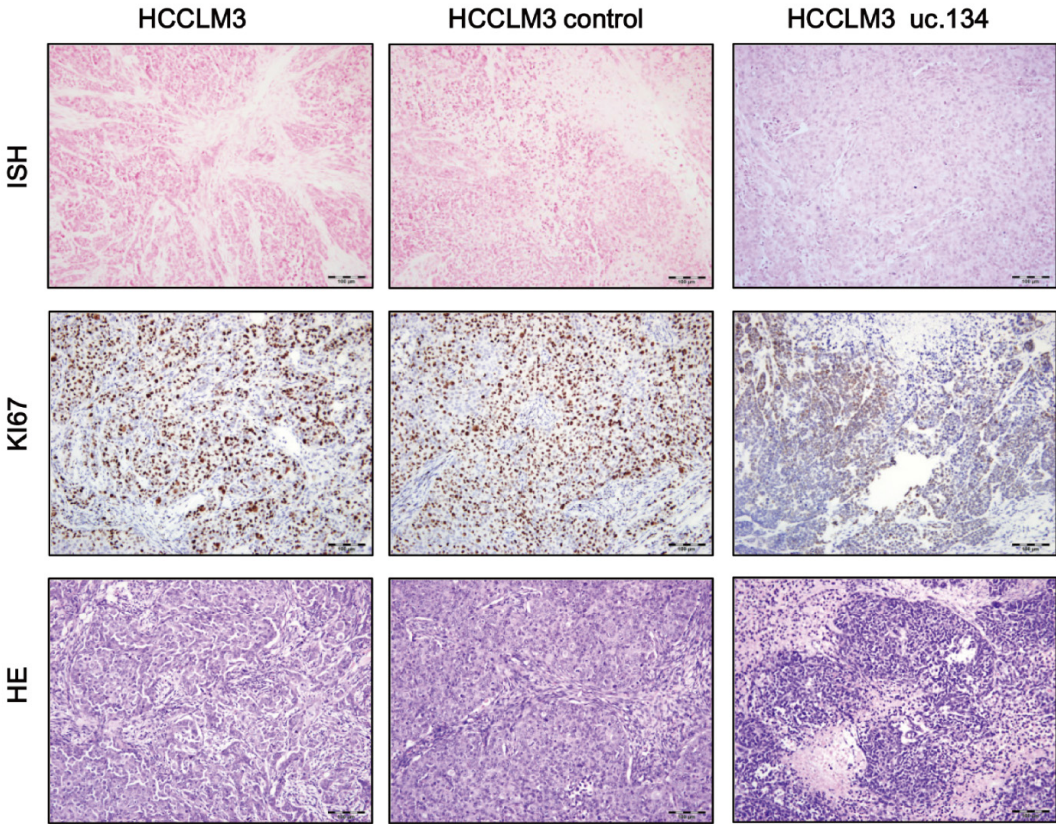

B

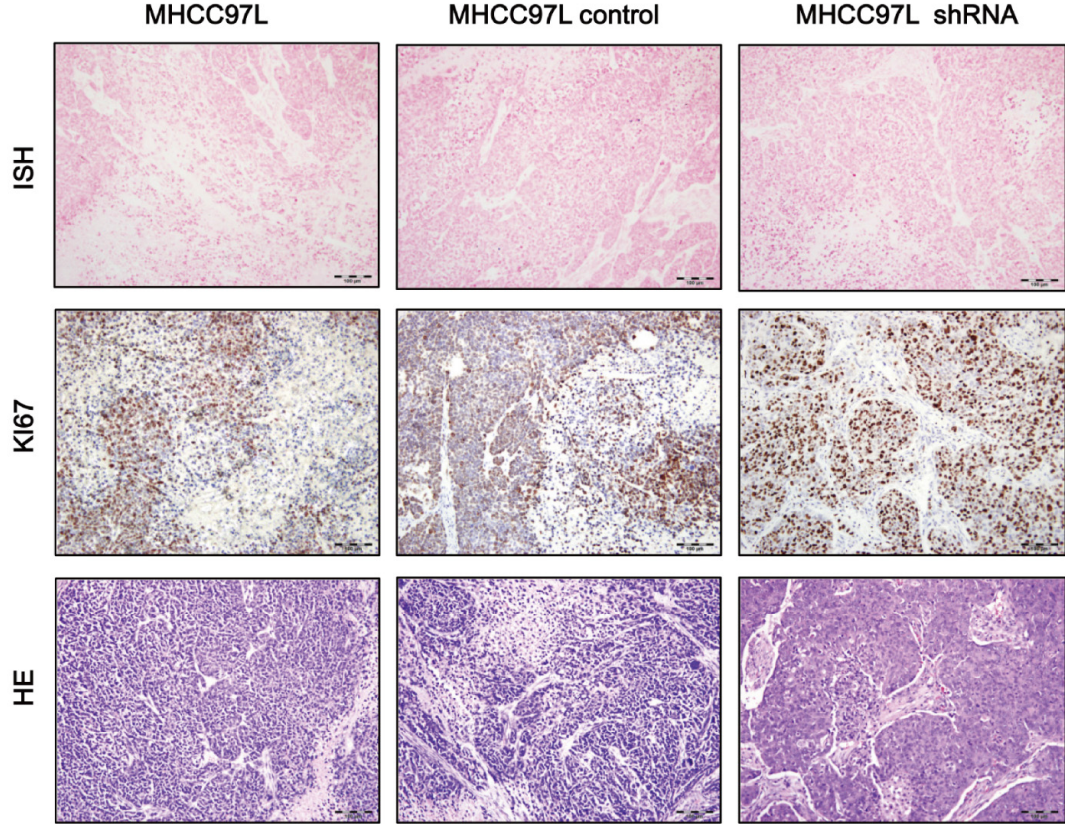

Figure S7. LATS1 and pYAP<sup>S127</sup> expression levels in HCC specimens.

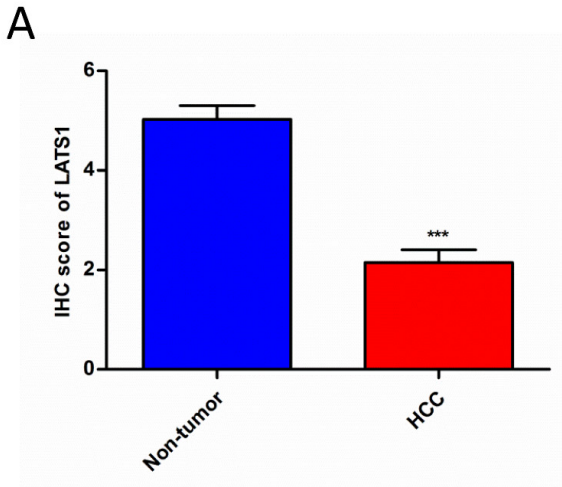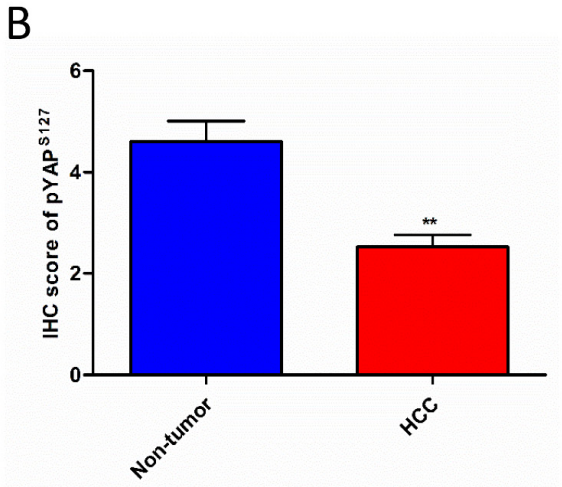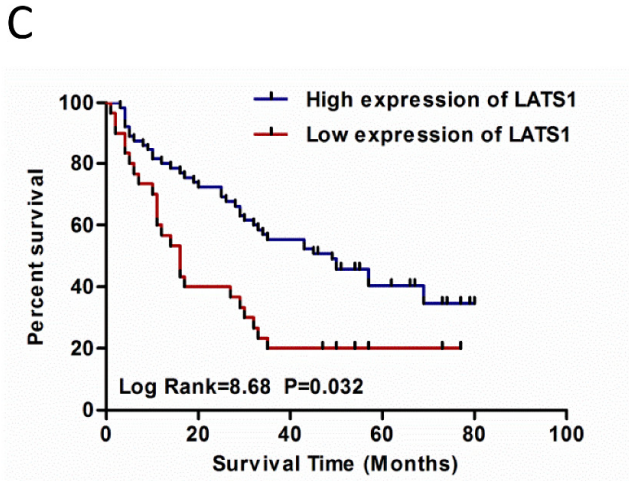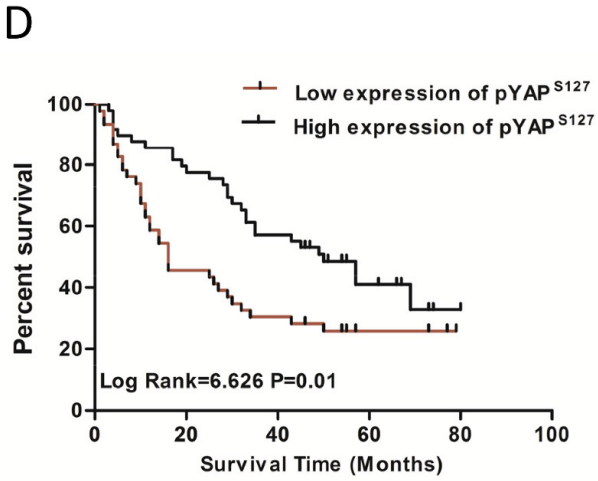

Supplement: MOESM5 [file 12231306]
