# Supplementary material for: A novel lncRNA uc.134 represses hepatocellular carcinoma progression by inhibiting CUL4A-mediated ubiquitination of LATS1
Source: Springer Nature journal article supplement (doi:10.1186/s13045-017-0449-4), 2017-04-18
Supplement: MOESM4 [file 12231306]

---

## Oligonucleotide sequences and primers for this study

qPCR primers gene expression and RIP: lncRNA uc.134 (forward, CCTTTAAGATCAGAGCAC; reverse, ACTTTCATCATAACCACC), nc-HOXA11-86(forward, CTGAGCCTTACGCTTCTTTC; reverse, CGCCTGGACCCACTTTATT), ENST00000426547(forward, ATCATCTCCCAAGAACAA; reverse, TTACAGCAATCCCAAGTC), ENST00000442971(forward, CATCACCTAGCGTCTTCG; reverse, :TGTTCTGACTGCTCCACC), ENST00000400856(forward, AGCCATCCTAAGAAACCT; reverse, ACTAGCAGCACTGACCCT), ENST00000394079(forward, GTTCCTGCTTTCACAGAATT; reverse, TTGCCATCCAACCACTCA), NR\_027250 (forward, GAAGGGAGTGTCAGAAGC; reverse, AGAATGGCACAGTGTAAGA), YAP(forward, TAGCCCTGCGTAGCCAGTTA; reverse, TCATGCTTAGTCCACTGTCTGT), CUL4A(forward, ACCTCGCACAGATGTACCAG; reverse, AGGTTGACGAACCGCTCATTC), MST1(forward, CTTGGTGCTACACAACAGAC; reverse, CAGACCTTGGTCGAGGAACTT), LATS1(forward, AATTTGGGACGCATCATAAAGCC; reverse, TCGTCGAGGATCTTGGTAACTC), CYR61(forward, CTCGCCTTAGTCGTCACCC; reverse, CGCCGAAGTTGCATTCCAG), c-Myc(forward, GGCTCCTGGCAAAGGTCA; reverse, CTGCGTAGTTGTGCTGATGT), E2F1(forward,

---

ACGCTATGAGACCTCACTGAA; reverse, TCCTGGGTCAACCCCTCAAG),  
β-actin(forward, GGGAAATCGTGCGTGACATTAAG; reverse,  
TGTGTTGGCGTACAGGTCTTTG), GAPDH(forward,  
AGCTGAACGGGAAGCTCACT; reverse, TGCTTAGCCAAATTCGTTG).

**The gene-specific primers used for the PCR of the RACE analyses were as**

**follows:** 5' RACE-outer: CGGACTTGGACGGCTTGCACAC;

5' RACE-inner: AGAAGCGGCTGCCCAGGTCGTT;

3' RACE-outer: GCCAGCCAGCAACAAAAGAG;

3' RACE-inner: TAATGAACACTAAAATGGGGAAGG.

**siRNA:** si-uc.134-1(sense, CCAUCCUCUAAUAAACCAATT; antisense,

UUGGUUUUUUAGAGGAUGGTT), si-uc.134-2(sense,

GAGACAGUAAACCUGGGUATT; antisense,

UACCCAGGUUUACUGUCUCTT), si-LATS1-1(sense,

GGGCAUGAAAUCCCUACAUTT; antisense,

AUGUAGGGAUUUCAUGCCCTT), si-LATS1-2(sense,

GCAGCGUCUACAUCGUAAATT; antisense,

UUUACGAUGUAGACGCUGCTT), si-CUL4A-1(sense,

GCAAAGCAUGUGGAUUCAATT; antisense,

UUGAAUCCACAUGCUUUGCTT), si-CUL4A-2(sense,

GCAAACUACUUUGGGACAUTT; antisense,

---

AUGUCCCAAAGUAGUUUGCTT).

**LNA™ ISH probes:** Scramble (/5DigN/GTG TAA CAC GTC TAT ACG CCC

A/3Dig\_N/), IncRNAuc.134 (/5DigN/TGTGCTCTGATCTTAAAGGCA/3Dig\_N/).
